# Supplementary material for: The Large Action of Chlorpromazine: Translational and Transdisciplinary Considerations in the Face of COVID-19
Source: PubMed Central journal article supplement (PMC7772402; doi:10.3389/fphar.2020.577678), 2020-12-16
Supplement: datasheet1.pdf [file datasheet1.pdf]

| PsyCHovid : CPZ Protocol for Covid-19 and Psychosis |                                                                                                                       |                                                                                                                                                                                                                   |
|-----------------------------------------------------|-----------------------------------------------------------------------------------------------------------------------|-------------------------------------------------------------------------------------------------------------------------------------------------------------------------------------------------------------------|
| Phase 1 : Subjects Enrollment                       |                                                                                                                       |                                                                                                                                                                                                                   |
| Inclusion Criteria                                  |                                                                                                                       | Exclusion Criteria                                                                                                                                                                                                |
| 1                                                   | Patients already treated for psychosis admitted to hospital.                                                          | History of severe hypersensitivity to CPZ or any other phenothiazine.                                                                                                                                             |
| 2                                                   | Age 18 and 65;<br>Hospitalized on an acute care ward due to COVID-19.                                                 | Active use of anti-viral therapies directed at SARS-CoV-2, except for remdesivir at the discretion of the treating physician. Antibiotics not directed at SARS-CoV-2 are allowed.                                 |
| 3                                                   | Gender: both males and females.                                                                                       | History of congenital long QT syndrome or known history of prolonged QT interval corrected by the Fridericia correction formula (QTcF) > 500 msec on electrocardiogram performed within 60 days of randomization. |
| 4                                                   | Positive RT-PCR assay for SARS-CoV-2 on a nasopharyngeal swab sample.                                                 | Patients who have been hospitalized for COVID-19 for more than 72 hours, including the hospitalization time at another hospital for patients who were transferred.                                                |
| 5                                                   |                                                                                                                       | Use of hydroxychloroquine, chloroquine or azithromycin within 30 days of Day 1.                                                                                                                                   |
| 6                                                   | The subject (or legally acceptable representative if applicable) must provide written informed consent for the trial. | Enrollment in another investigational study within 30 days of Day 1.                                                                                                                                              |
| 7                                                   |                                                                                                                       | Known psychiatric or substance abuse disorder that would interfere with the requirements of the trial.                                                                                                            |
| 8                                                   |                                                                                                                       | Unwilling or unable to comply with the study protocol.                                                                                                                                                            |
| 9                                                   |                                                                                                                       | Any condition, which in the opinion of the investigator, would preclude participation in the trial.                                                                                                               |
| 10                                                  |                                                                                                                       | Healthy volunteers not allowed to participate.                                                                                                                                                                    |

**Appendix. PsyCHovid : CPZ Protocol for Covid-19 and Psychosis**

| Phase 2 : Subjects Randomization<br>(Two Groups) |                                                                                                                                                                                                                                                                                                                                                                                                                                                                                                                                                                    | Intervention\Treatment |
|--------------------------------------------------|--------------------------------------------------------------------------------------------------------------------------------------------------------------------------------------------------------------------------------------------------------------------------------------------------------------------------------------------------------------------------------------------------------------------------------------------------------------------------------------------------------------------------------------------------------------------|------------------------|
| Group A : <u>Placebo Arm</u>                     | Placebo Comparator: BSC<br>No active, only best supportive care (BSC).                                                                                                                                                                                                                                                                                                                                                                                                                                                                                             | Other: TAU             |
| Group B : <u>Interventional Arm</u>              | Experimental: CPZ+ BSC<br>Chlorpromazine tablets.                                                                                                                                                                                                                                                                                                                                                                                                                                                                                                                  | Drug: CPZ              |
| Protocol Parameters                              |                                                                                                                                                                                                                                                                                                                                                                                                                                                                                                                                                                    |                        |
| Baseline :                                       | Patients already treated for psychosis and receiving antipsychotic medication.                                                                                                                                                                                                                                                                                                                                                                                                                                                                                     |                        |
| Interventional Protocol :                        | 1- Add-on CPZ and decrease their current antipsychotic and sleep pills.<br>2- Randomization will be between two groups of trial; One will receive CPZ and decrease the antipsychotic and Experimental Oral Psychoses Adult: 25 mg at night 3 days then 50 mg 3 days and; may be given as a single 75 mg dose at night.                                                                                                                                                                                                                                             |                        |
| Comparison group :                               | No change.                                                                                                                                                                                                                                                                                                                                                                                                                                                                                                                                                         |                        |
| Treatment Variables :                            | CPZ, Antipsychotic medications, and doses.                                                                                                                                                                                                                                                                                                                                                                                                                                                                                                                         |                        |
| Contraindications :                              | <i>Subjects with the following Conditions\Diseases:</i> Hypersensitivity to phenothiazine; Preexisting CNS Depression, Coma, Bone-Marrow Suppression; Phaeochromocytoma; Lactation, History of Neuroleptic Malignant Syndrome.                                                                                                                                                                                                                                                                                                                                     |                        |
| Special Precautions :                            | <i>Subjects should be careful if they have the following Conditions\Diseases:</i> Parkinson's Disease; CV Disease; Renal or Hepatic Impairment; Jaundice; DM; Hypothyroidism; Paralytic ileus; Prostatic Hyperplasia or Urinary Retention; Epilepsy or History of Seizures; Myasthenia Gravis; Pregnancy;<br><i>Subjects they should avoid:</i> direct sunlight.                                                                                                                                                                                                   |                        |
| Timeline :                                       | Depends on the outcomes, if primary outcomes present on the subject, time frame will be: 15 days, if secondary outcomes present on the subject, time frame : will be through study completion/discharge (an average of 30 days with a maximum of 4 months).                                                                                                                                                                                                                                                                                                        |                        |
| Maintenance :                                    | 25-100 mg night increased to 300mg daily as required in psychotic patients (25-100mg tid). With a decrease of their usual night medication. The decrease of the current antipsychotics will be based on the Chlorpromazine equivalent table. For instance if a patient took 6 mg of risperidone, the CPZ equivalent is 300mg, so the adjusted dosage of risperidone after randomization to experimental CPZ harm at 100mg will be 4 mg.                                                                                                                            |                        |
| For Research Purposes :                          | <p><b>CPZeq method is set in 300 mg/day of chlorpromazine as a maintenance dose.</b></p> <p><i>The concept of CPZeq was derived from the potency for Dopamine receptor blockade, which was determined empirically to judge the dose equivalence between different Antipsychotic agents.</i></p> <p>-Shih-Ku LinLin, Shih-Ku, et al. "Comparison of the Defined Daily Dose and Chlorpromazine Equivalent Methods in Antipsychotic Drug Utilization in Six Asian Countries." (2018): 1847-1852.</p>                                                                  |                        |
| Outcome Measures :                               |                                                                                                                                                                                                                                                                                                                                                                                                                                                                                                                                                                    |                        |
| A. Primary Outcome Measures :                    | <p><b>1. A composite endpoint of mortality.</b></p> <p><b>2. Ongoing need for hospitalization.</b></p> <p><b>3. Requirement for mechanical ventilation/extracorporeal membrane oxygenation (ECMO) at Day 15 after randomization.</b></p> <p>-Time Frame : 15 days.</p> <p>- <b>Determine if</b> : CPZ + best supportive care (BSC) as compared to TAU + BSC reduces the composite endpoint of mortality, ongoing need for hospitalization, or requirement for mechanical ventilation/extracorporeal membrane oxygenation (ECMO) at Day 15 after randomization.</p> |                        |

|                                               |                                                                                                                                                                                                                                                                                                                                                                                                                                                                                                                                                                                                                                                                                                                                                                                                                                                                                                                                                                                                                                                                                                                                                                                                                                                                                                                                                                                                                                                                                                                                                                                                                                                                                                                                                                                                                                                                                                                                                                                                                                                                            |
|-----------------------------------------------|----------------------------------------------------------------------------------------------------------------------------------------------------------------------------------------------------------------------------------------------------------------------------------------------------------------------------------------------------------------------------------------------------------------------------------------------------------------------------------------------------------------------------------------------------------------------------------------------------------------------------------------------------------------------------------------------------------------------------------------------------------------------------------------------------------------------------------------------------------------------------------------------------------------------------------------------------------------------------------------------------------------------------------------------------------------------------------------------------------------------------------------------------------------------------------------------------------------------------------------------------------------------------------------------------------------------------------------------------------------------------------------------------------------------------------------------------------------------------------------------------------------------------------------------------------------------------------------------------------------------------------------------------------------------------------------------------------------------------------------------------------------------------------------------------------------------------------------------------------------------------------------------------------------------------------------------------------------------------------------------------------------------------------------------------------------------------|
|                                               |                                                                                                                                                                                                                                                                                                                                                                                                                                                                                                                                                                                                                                                                                                                                                                                                                                                                                                                                                                                                                                                                                                                                                                                                                                                                                                                                                                                                                                                                                                                                                                                                                                                                                                                                                                                                                                                                                                                                                                                                                                                                            |
| <p><b>B. Secondary Outcome Measures :</b></p> | <p><b>1. Time to Clinical Improvement.</b><br/> -<b>Time Frame</b> : Through study completion/discharge (an average of 30 days with a maximum of 4 months).<br/> -<b>Determine if</b> : CPZ + BSC as compared to TAU + BSC reduces time to clinical improvement as defined by a decline of 2 categories or more from the baseline on the modified 7-category ordinal scale of clinical status of hospitalized influenza patients.</p> <p><b>2. Inpatient mortality.</b><br/> -<b>Time Frame</b> : Through study completion/discharge (an average of 30 days with a maximum of 4 months).<br/> - <b>Determine if</b> : CPZ + BSC as compared to TAU + BSC reduces inpatient mortality.</p> <p><b>3. Duration of hospitalization.</b><br/> -<b>Time Frame</b> : Through study completion/discharge (an average of 30 days with a maximum of 4 months).<br/> -<b>Determine if</b> : CPZ + BSC as compared to TAU + BSC shortens the duration of hospitalization.</p> <p><b>4. Duration of intubation for mechanical ventilation.</b><br/> -<b>Time Frame</b> : Through study completion/discharge (an average of 30 days with a maximum of 4 months).<br/> -<b>Determine if</b> : CPZ + BSC as compared to TAU + BSC shortens the duration of intubation for mechanical ventilation.</p> <p><b>5. Time to normalization of temperature.</b><br/> - <b>Time Frame</b> : Through study completion/discharge (an average of 30 days with a maximum of 4 months).<br/> -<b>Determine if</b> : CPZ + BSC as compared to TAU + BSC reduces the time to normalization of temperature (T &lt; 37.5 for 48 hours).</p> <p><b>6. Maximum severity of COVID19 illness.</b><br/> -<b>Time Frame</b> : Through study completion/discharge (an average of 30 days with a maximum of 4 months).<br/> -<b>Determine if</b> : CPZ + BSC as compared to TAU + BSC reduces the maximum severity of COVID-19 illness based on the modified 7-category ordinal scale of clinical status of hospitalized influenza patients.<br/> <i>(Score range 1-7, higher scores equals worse outcome).</i></p> |

|  |                                                                                                                                                                                                                                                                                                                                                              |
|--|--------------------------------------------------------------------------------------------------------------------------------------------------------------------------------------------------------------------------------------------------------------------------------------------------------------------------------------------------------------|
|  | <p><b>7. Biochemical Responses:</b></p> <p>A. <i>Airal load of SARS-CoV-2 on a nasopharyngeal sample.</i><br/> <b>-Time Frame:</b> day 7 from randomization.</p> <p>B. <i>Serum viral load of SARS-CoV-2.</i><br/> <b>-Time Frame:</b> day: Day15.</p> <p>C. <i>Biochemical response: C-reactive protein (CRP).</i><br/> <b>-Time Frame:</b> Days: 3,15.</p> |
|  | <p><b>8. Rates of Serious Adverse Events.</b><br/> <b>-Time Frame :</b> Days 7, 15.</p>                                                                                                                                                                                                                                                                      |
|  | <p><b>9. Rates of Non-Serious Side Effects.</b><br/> <b>-Time Frame :</b> Days 7,15.</p>                                                                                                                                                                                                                                                                     |
|  | <p><b>10. Extrapiramidal Assessment: ESRS Scale.</b><br/> <b>-Time Frame :</b> Days 7,15.</p>                                                                                                                                                                                                                                                                |
|  | <p><b>11. Subjective Cognitive Complains: SSTICS.</b><br/> <b>-Time Frame :</b> Days 7,15.</p>                                                                                                                                                                                                                                                               |
|  | <p><b>12. Prolactine Level.</b><br/> <b>-Time Frame :</b> Days 15, 30.</p>                                                                                                                                                                                                                                                                                   |
|  | <p><b>13. Psychiatric Symptoms Assessment: SSPI (Peter Liddle) Time : Days 7, 15, 30</b></p>                                                                                                                                                                                                                                                                 |
